# Supplementary material
Source: publisher figshare collection journal article supplement (https://aacr.figshare.com/ndownloader/files/39970918)

**Supplement Legends**

**Table S1.** Frequencies of gene locus amplifications across tumor types

**Table S2.** Effect of FGFR inhibitors on growth of RK3E expressing *FGFR2* and *FGFR3* fusion constructs and RT-4 bladder cancer cell line

**Figure S1.** Chemical structure of JNJ-42756493

**Figure S2.** Western Blot confirming the overexpression of HA-tagged *FGFR2* fusion genes

**Table S1.** Frequencies of gene locus amplifications across tumor types

|  | **8p12**  **(*FGFR1*)** | **10q26**  **(*FGFR2*)** | **4p16**  **(*FGFR3*)** | **5q33**  **(*FGFR4*)*** |
| --- | --- | --- | --- | --- |
| **Breast cancer** | 11.7% (29/248) | 6.6% (13/198) | 3% (1/29) | 8.6% (15/175) |
| **NSCLC** | 21.6% (45/208) | 5.6% (11/195) | 5% (1/19) | 5% (5/99) |
| **Colon cancer** | 0% (0/101) | 0% (0/73) | 0% (0/90) | 0% (0/88) |
| **Prostate cancer** | 14.6% (14/96) | 1.1% (1/94) | NA | NA |
| **Malignant melanoma** | 0% (0/24) | 0% (0/32) | 0% (0/25) | 0% (0/25) |
| **Ovarian cancer** | 3% (1/35) | 6% (2/36) | NA | NA |

**FGFR4* gene locus was assessed using the surrogate of the neighboring gene *NSD1* (5q35) and only the gene dose has been evaluated. FGFR, fibroblast growth factor receptor; NA, not available; NSCLC, non-small cell lung cancer.

**Table S2.** Effect of FGFR inhibitors on growth of RK3E expressing *FGFR2* and *FGFR3* fusion constructs and RT-4 bladder cancer cell line

|  | **Proliferation IC50** | | |
| --- | --- | --- | --- |
| **RK3E – Transgene** | **Erdafitinib**  **(nM)** | **AZD4547**  **(nM)** | **NVP-BGJ398**  **(nM)** |
| **Vector** | 7010 | 8011 | >10 µM |
| **AFF3** | 0.1133 | 2.809 | 2.273 |
| **BAIA2PL1** | 0.3211 | 11.54 | 5.162 |
| **BICC1** | 0.3303 | 6.448 | 18.19 |
| **CASP7** | 0.4718 | 4.107 | 241.5 |
| **CCDC6** | 0.1894 | 13.36 | 10.72 |
| **OFD1** | 0.2303 | 7.259 | 15.99 |
| **TACC3-V1** | 0.2915 | 16.53 | 2.594 |
| **TACC3-V3** | 0.2706 | 8.664 | 4.092 |
| **RT-4** | 0.1882 | 18.585 | 3.379 |

**Figure S1.** Chemical structure of JNJ-42756493


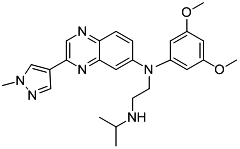


**Figure S2.** Western Blot confirming the overexpression of HA-tagged *FGFR2* fusion genes


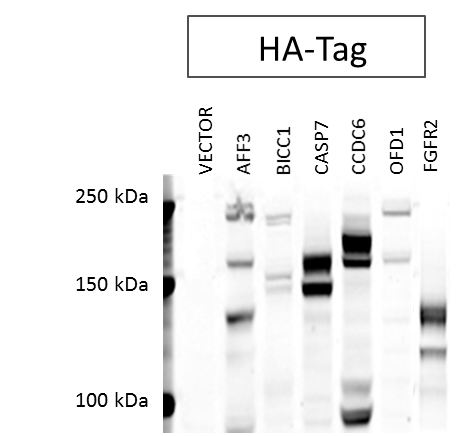

Supplement: Supplementary file 1 [file 39970918]
